# Supplementary material
Source: MDPI journal article supplement (https://www.mdpi.com/2311-7524/9/10/1149)
Supplement: s1 [file s1]

**Table S1.** Primers used for reverse transcription quantitative PCR analysis

| <b>Gene</b>      | <b>Gene description</b>                                    | <b>Locus tag</b> | <b>Forward primer (5' to 3')</b> | <b>Reverse primer (5' to 3')</b> |
|------------------|------------------------------------------------------------|------------------|----------------------------------|----------------------------------|
| <i>PpIAA3</i>    | auxin-induced protein<br>22B                               | Prupe.6G343700   | GTGATTATTGTGAGAAGGAT             | CACGAAGTGATGAACATT               |
| <i>PpIAA5</i>    | auxin-induced protein<br>IAA6                              | Prupe.3G074800   | AAAGCGAAACGAAGAACCA<br>AG        | GCTCCATCCATGCTAACCT<br>TGAC      |
| <i>PpIAA11</i>   | auxin-responsive protein<br>IAA11                          | Prupe.8G215400   | CTTCTTCGTCGTCCTCAT               | AATCAGCACTTCTCTTGGT              |
| <i>PpIAA17</i>   | auxin-responsive protein<br>IAA1                           | Prupe.3G074900   | CTTCTTGACCATCCGTAA               | CCATCTCTGCTCCTCATAAG             |
| <i>PpIAA29</i>   | auxin-responsive protein<br>IAA29                          | Prupe.1G481700   | ATGTTGGTGAAGGTGAAG               | AGCGTCTGATAAGAGTGA               |
| <i>PpARF5</i>    | auxin response factor 5                                    | Prupe.1G368300   | GAAGGGCTGCTAAATGACCC<br>AAGA     | ATACAGCGAACACAACCA<br>ACGA       |
| <i>PpARF7</i>    | auxin response factor 7                                    | Prupe.7G194200   | AATTGAGCCTGTTGTAAGTC<br>C        | TGCCAAAGTCATCTCCAAG<br>CCAA      |
| <i>PpARF8</i>    | auxin response factor 6                                    | Prupe.3G182900   | AGGCATCTTCTCACGACAGG             | GATTGCTCGCCGAATACC<br>CA         |
| <i>PpARF16</i>   | auxin response factor 18                                   | Prupe.2G213000   | ATCAAGCATACCAGCCATCC<br>A        | GCTACAAACTGAAGGCATT<br>GGA       |
| <i>PpARF18</i>   | auxin response factor 18                                   | Prupe.2G190400   | CAAAGCCAAGTAATACCCCG<br>AT       | TTTACACACTGGCTCGCTC<br>T         |
| <i>PpSAUR50</i>  | auxin-responsive protein<br>SAUR50                         | Prupe.6G108400   | AATGTGCCAGAAGATGTG               | GTGTCAAGTAACTCAATGC              |
| <i>PpGH3.1</i>   | probable indole-3-acetic<br>acid-amido synthetase<br>GH3.1 | Prupe.8G137900   | ATCGCTCTCCTATCTTGT               | ACTCCTCCTGAATTGTTG               |
| <i>PpYUCCA2</i>  | indole-3-pyruvate<br>monooxygenase<br>YUCCA2               | Prupe.7G231200   | CCACTTACCCAACCAAAC               | CACTCACCCTGTCATATT<br>G          |
| <i>PpYUCCA6</i>  | indole-3-pyruvate<br>monooxygenase YUCCA6                  | Prupe.1G453400   | ATTGCTGAGGACATTGAA               | GTGATGATGATGATGATAG<br>TG        |
| <i>PpYUCCA10</i> | probable indole-3-pyruvate<br>monooxygenase<br>YUCCA10     | Prupe.8G252500   | CCATTGATGTTGGAACCT               | CCTCTTATGCTGCTGATT               |
| <i>PpSAM</i>     | S-adenosylmethionine<br>synthase 5                         | Prupe.1G107000   | GATGAGATTGCTGCTGAT               | GTTGAGATGGAAGATGGT               |

|                 |                                                 |                |                       |                       |
|-----------------|-------------------------------------------------|----------------|-----------------------|-----------------------|
| <i>PpERF4</i>   | ethylene-responsive transcription factor 4      | Prupe.4G051400 | TAGCGGAAACGTGAAGGAG   | TCTGATCTCGGCAGCGTA    |
| <i>PpERF034</i> | ethylene-responsive transcription factor ERF034 | Prupe.2G123200 | CAACAACAACCTTCTGATTCT | CTGCCTCTTCTTCTTCTT    |
| <i>Ppβ-gal</i>  | beta-galactosidase 10                           | Prupe.4G278500 | AATGTGCTGGTGATATTC    | AAGATTCAAGGTCAATAGAG  |
| <i>PpPA</i>     | pectin acetylerase 9                            | Prupe.2G296000 | GAAGCAGTAGGTGATTGG    | TAAGGTTATGGCAGGTAGT   |
| <i>PpExp2</i>   | expansin-A1                                     | Prupe.1G276700 | GTTGCTTACAGAAGGGTA    | CAGGTTGAAGTAGGAGTG    |
| <i>PpPMEI</i>   | 21 kDa protein                                  | Prupe.2G279800 | TTGATGGTGTGAAGGTAA    | AATGAGGCTGTCTATGAG    |
| <i>PpGlu</i>    | glucan endo-1,3-beta-glucosidase 9              | Prupe.6G050800 | TAGTGAACAACAATAAGG    | ATTATGCTGCTGATAGTA    |
| <i>PpPG</i>     | polygalacturonase At1g48100                     | Prupe.1G251200 | GAATCAGCATCGGAAGTT    | ACCATTTCATCGTGTGTG    |
| <i>PpACO1</i>   | 1-aminocyclopropane-1-carboxylate oxidase 1     | Prupe.4G013800 | TTGATGAAGATTACAGGAAGT | CACAGCAAGTCCAGAAGT    |
| <i>PpTEF2</i>   | elongation factor 2                             | LOC18778380    | GTTGCCTTGGTCGGTCTTGA  | ATTGAACAGCAACACGCACAA |

**Table S2.** Primers used for vector construction

| Name                   | Forward/ Reverse primer Sequence (5' to 3')     | Description                                                          |
|------------------------|-------------------------------------------------|----------------------------------------------------------------------|
| OE- <i>PpIAA5</i> F    | gagagaacacgggggactctagaATGGCCAAAGAAGGTTTAG      | Primers used for inserting <i>PpIAA5</i> into vector pCAMBIA3301-121 |
| OE- <i>PpIAA5</i> R    | ataagggactgaccacccgggTTATTTAGGATCATCTTTCATAGTT  |                                                                      |
| OE- <i>PpARF8</i> F    | gagagaacacgggggactctagaATGAGACTTTCGTCTTCATCATC  | Primers used for inserting <i>PpARF8</i> into vector pCAMBIA3301-121 |
| OE- <i>PpARF8</i> R    | ataagggactgaccacccgggGTAGTCCAGTGAGCCCAACGA      |                                                                      |
| pTRV2- <i>PpARF8</i> F | aaggttacgaattctctagaCTTCATCATCGGCTTCGGGTTTTAA   | Primers used for inserting <i>PpARF8</i> into vector pTRV2           |
| pTRV2- <i>PpARF8</i> R | ggtaccggatcccatggaggCCCAACTCCGCAGGCAGTAGGTATA   |                                                                      |
| GFP- <i>PpIAA5</i> F   | gagaacacgggggactctagaATGGCCAAAGAAGGTTTAG        | Primers used for inserting <i>PpIAA5</i> into vector pBI121-GFP      |
| GFP- <i>PpIAA5</i> R   | ggactgaccacccgggTTATTTAGGATCATCTTTCATAGTT       |                                                                      |
| GFP- <i>PpARF8</i> F   | gagaacacgggggactctagaATGAGACTTTCGTCTTCATCATC    | Primers used for inserting <i>PpARF8</i> into vector pBI121-GFP      |
| GFP- <i>PpARF8</i> R   | ggactgaccacccgggGTAGTCCAGTGAGCCCAACGA           |                                                                      |
| CE- <i>PpIAA5</i> F    | CGggatccATGGCCAAAGAAGGTTTAGGG                   | Primers used for inserting <i>PpIAA5</i> into pSPYCE (M)             |
| CE- <i>PpIAA5</i> R    | GGggtaccTTTAGGATCATCTTTCATAGTTGCC               |                                                                      |
| NE- <i>PpARF8</i> F    | ggagagaacacgggggactctagaATGAGACTTTCGTCTTCATCATC | Primers used for inserting <i>PpARF8</i> into pSPYNE173              |
| NE- <i>PpARF8</i> R    | ttgtccatcccgggagcgggtaccGTAGTCCAGTGAGCCCAACGA   |                                                                      |

**Table S3.** Primers for yeast-two hybrid vector construction

| GENE           | Forward primer (5' to 3') | Reverse primer (5' to 3') | Amplicon Size (bp) |
|----------------|---------------------------|---------------------------|--------------------|
| <i>PpARF2</i>  | ATGACGTCATCGGAGGTTTCG     | AGGAAGTAGCTGAGACTTCCCCTC  | 2517               |
| <i>PpARF3</i>  | ATGGGGGGTCTAATCGATC       | TCCTTGTAACAGCTTTCCATC     | 2166               |
| <i>PpARF4</i>  | ATGGAAATTGATCTGAACCATGCAG | GACCCTGATTACTGTTGGGGAAGAA | 2409               |
| <i>PpARF6</i>  | ATGAGGCTCTCATCTGCT        | ATACTCGAGTGACCCAC         | 2661               |
| <i>PpARF7</i>  | ATGAAGGCTCCTTCAAATGGG     | TTTTTGATTGCGATTAAATGAGG   | 3504               |
| <i>PpARF8</i>  | ATGAGACTTTCGTCTTCATCATC   | GTAGTCCAGTGAGCCCAACGA     | 2757               |
| <i>PpARF19</i> | ATGAAGCCGCCGCGAA          | GGCATTCCCACCATCTGAGC      | 3417               |
| <i>PpIAA5</i>  | ATGGCCAAAGAAGGTTTAG       | TTATTAGGATCATCTTTCATAGTT  | 573                |

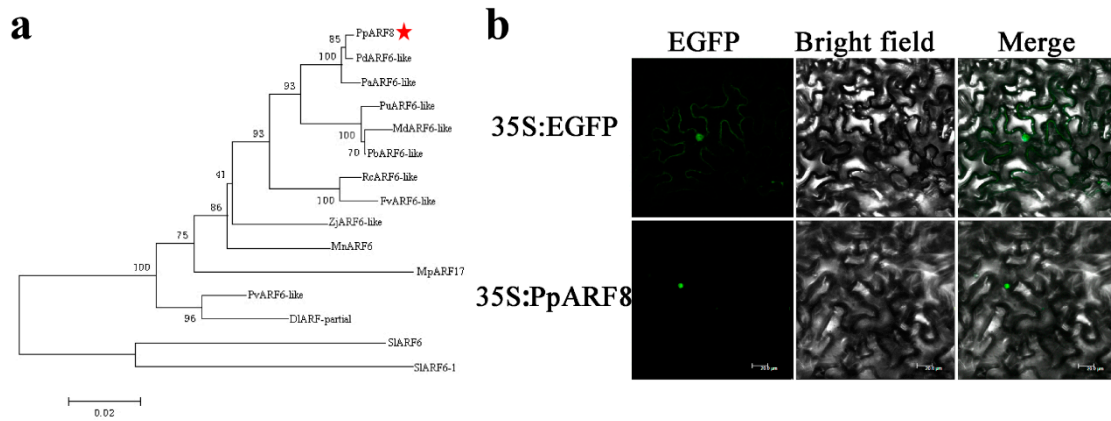

**Figure S1.** Analysis of PpARF8 characteristics. (a) Homology of PpARF8 homologues among different species. (Note: Phylogenetic tree derived from amino acid sequences of ARFs in peach and other species. PpARF8 was highlighted with the red pentagram. The phylogenetic tree was constructed using the maximum-likelihood method by MEGA 5.0. Numbers indicate bootstrap test result with 1000 replicate analyses. The scale bar represents 0.02 substitutions per site.); (b) The results of subcellular localization showed that PpARF8 was localized in the nucleus, Scale bar = 20  $\mu$ m.
